# Supplementary material for: HDAC Inhibitors Repress BARD1 Isoform Expression in Acute Myeloid Leukemia Cells via Activation of miR-19a and/or b
Source: PubMed Central journal article supplement (PMC3859623; doi:10.1371/journal.pone.0083018), 2013-12-11

DAPI

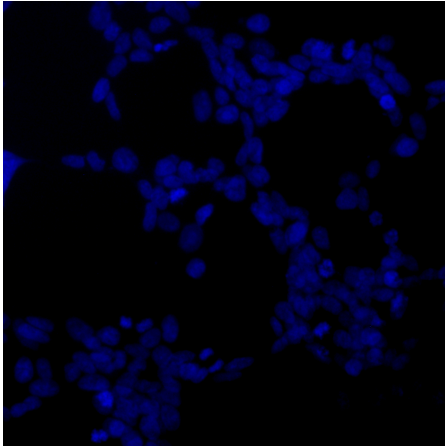

$\omega$ 1-bioTag

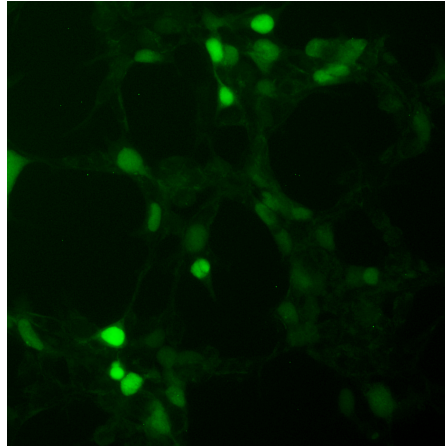

Merge

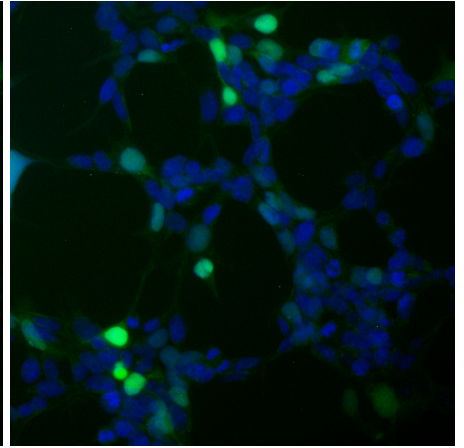

Supplement: pone.0083018.s005.pdf [file pone.0083018.s005.pdf]
